# Supplementary material for: Pressure-induced order–disorder transitions in β-In2S3: an experimental and theoretical study of structural and vibrational properties
Source: Royal Society of Chemistry journal article supplement (doi:10.1039/d1cp02969j), 2021-01-01
Supplement: d1cp02969j1.pdf [file d1cp02969j1.pdf]

1  
2 **Supplementary information of**  
3 **Pressure-induced order-disorder transitions in  $\beta$ -In<sub>2</sub>S<sub>3</sub>: an**  
4 **experimental and theoretical study of structural and**  
5 **vibrational properties**

6 S. Gallego-Parra<sup>1\*</sup>, O. Gomis<sup>2\*</sup>, R. Vilaplana<sup>2</sup>, V.P. Cuenca-Gotor<sup>1</sup>, D. Martínez-  
7 García<sup>3</sup>, P. Rodríguez-Hernández<sup>4</sup>, A. Muñoz<sup>4</sup>, A.H. Romero,<sup>5</sup> A. Majumdar<sup>6,7</sup>, R.  
8 Ahuja<sup>6,8</sup>, C. Popescu<sup>9</sup> and F. J. Manjón<sup>1</sup>  
9

10 <sup>1</sup>*Instituto de Diseño para la Fabricación y Producción Automatizada, MALTA Consolider*  
11 *Team, Universitat Politècnica de València, 46022 València, Spain*

12 <sup>2</sup>*Centro de Tecnologías Físicas, MALTA Consolider Team, Universitat Politècnica de València,*  
13 *46022 València, Spain*

14 <sup>3</sup>*Departamento de Física Aplicada-ICMUV-MALTA Consolider Team, Universitat de València,*  
15 *c/Dr. Moliner 50, 46100 Burjassot (València), Spain*

16 <sup>4</sup>*Departamento de Física, Instituto de Materiales y Nanotecnología, MALTA Consolider Team,*  
17 *Universidad de La Laguna, 38207 San Cristóbal de La Laguna, Spain*

18 <sup>5</sup>*Physics Department, West Virginia University, Morgantown, 26505, USA*

19 <sup>6</sup>*Department of Physics and Astronomy, Box 516, Uppsala University, Uppsala, SE-75120,*  
20 *Sweden*

21 <sup>7</sup>*Département de Physique and Regroupement Québécois sur les Matériaux de Pointe,*  
22 *Université de Montréal, C. P. 6128, Succursale Centre-Ville, Montréal, Québec H3C 3J7,*  
23 *Canada*

24 <sup>8</sup>*Department of Physics, Indian Institute of Technology Ropar, Rupnagar 140001, Punjab,*  
25 *India*

26 <sup>9</sup>*ALBA-CELLS, MALTA Consolider Team, 08290 Cerdanyola del Valles (Barcelona),*  
27 *Catalonia, Spain*

28

29 \*Corresponding authors: S. Gallego-Parra (sagalpar@doctor.upv.es), O. Gomis  
30 (osgohi@fis.upv.es)

31

32

33

34 **Figure S1.** Theoretical pressure dependence of the unit cell volume of  $\beta$ - $\text{In}_2\text{S}_3$  and the  
35 polyhedral volumes corresponding to the  $\text{InS}_4$  and vacancy tetrahedra,  $\text{VacS}_4$ , (8e and 4a  
36 sites) and  $\text{InS}_6$  octahedra (8c and 16h sites).

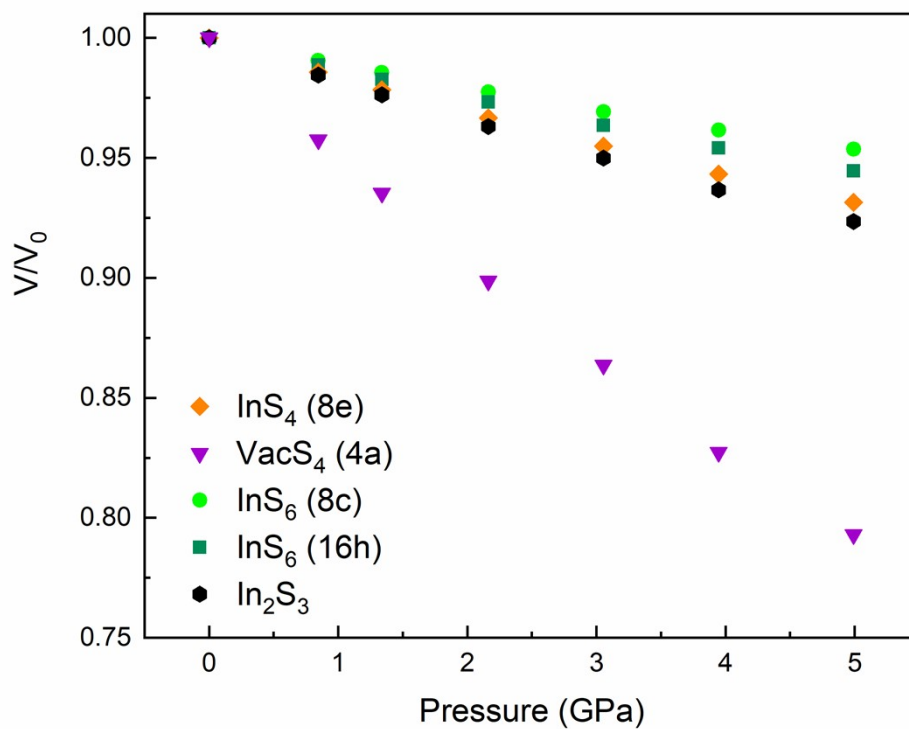

37

38

39 **Figure S2.** Theoretical pressure dependence of the interatomic distances in  $\beta$ - $\text{In}_2\text{S}_3$ ,  
 40 corresponding to a)  $\text{InS}_4$  and b) vacancy tetrahedra,  $\text{VacS}_4$ , (8e and 4a sites), c) and d)  
 41  $\text{InS}_6$  octahedra (8c and 16h sites, respectively).

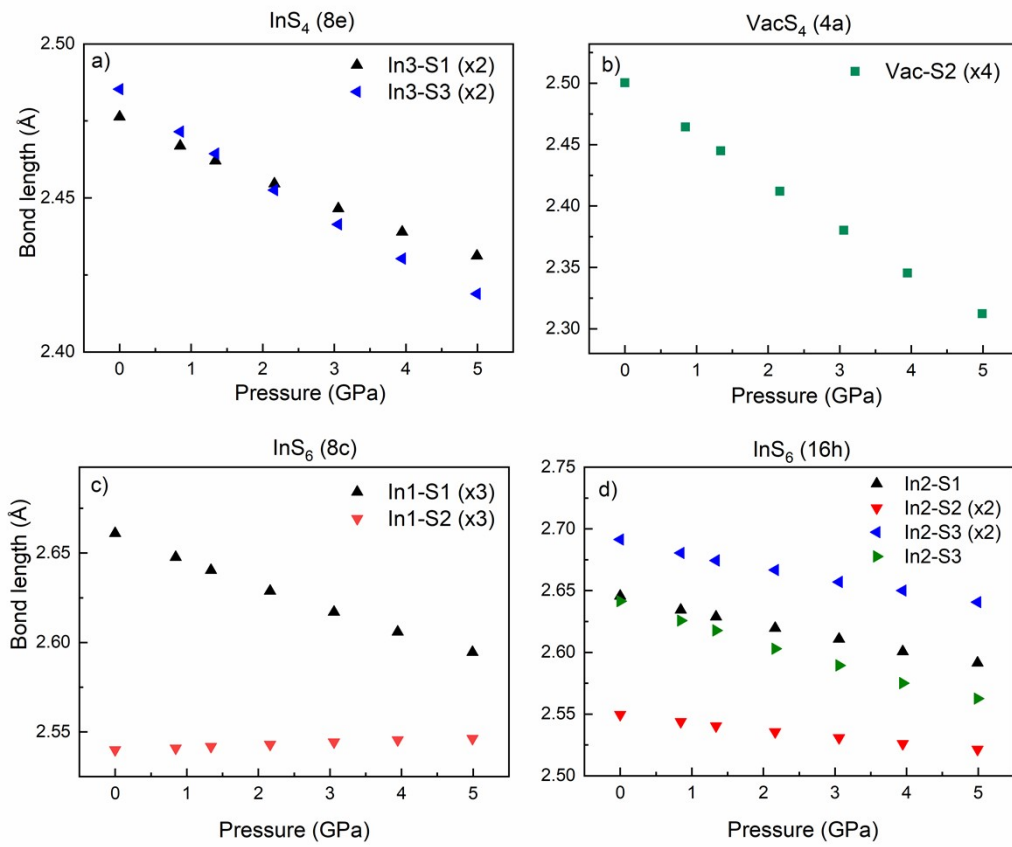

42

43

44 **Figure S3.** Theoretical pressure dependence of a) the effective coordination number  
 45 (ECoN), b) bond angle variance ( $\sigma^2$ ), c) quadratic elongation ( $\lambda$ ) and d) distortion index  
 46 (D) corresponding to  $\text{InS}_4$  and vacancy tetrahedra,  $\text{VacS}_4$ , (8e and 4a sites), and  $\text{InS}_6$   
 47 octahedra (8c and 16h sites).

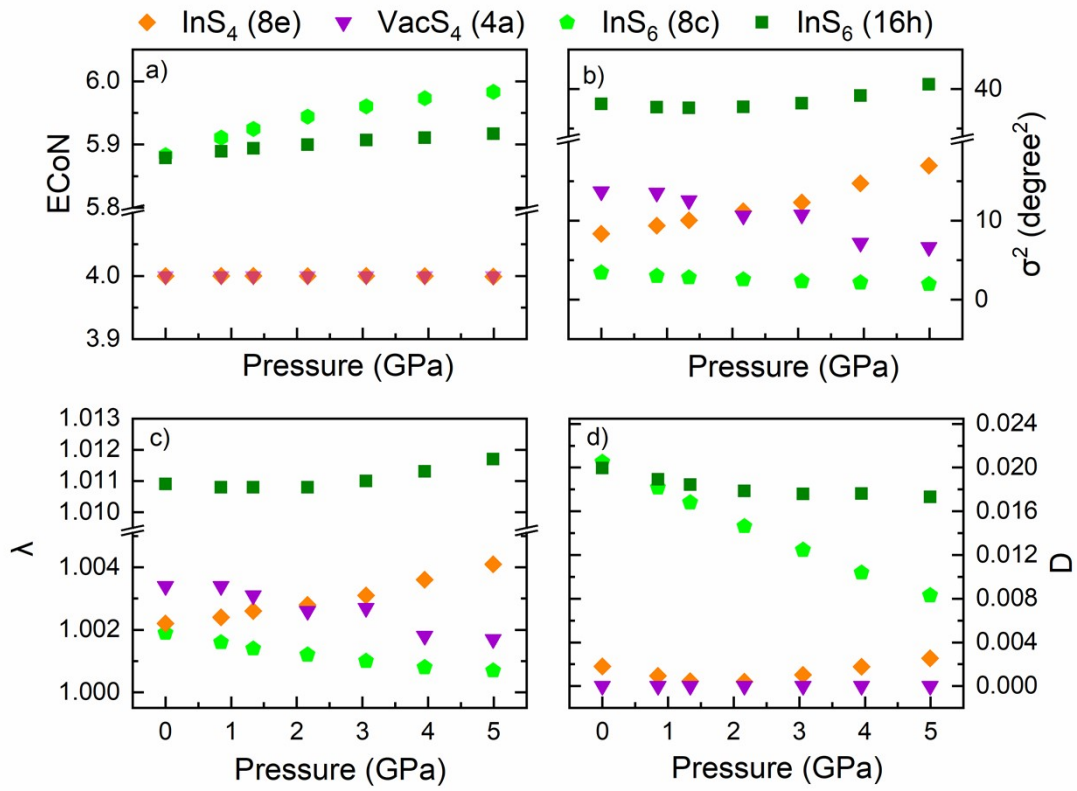

48

49

50 **Figure S4.** Commercial  $\alpha$ - $\text{In}_2\text{S}_3$  powders of Sigma Aldrich at room pressure: (a) Le Bail  
51 refinement of the XRD pattern with the cubic spinel structure and (b) RS spectrum.  
52 Theoretical zero pressure frequencies of Raman-, IR-active, and silent modes of  $\text{CdIn}_2\text{S}_4$   
53 at room pressure are given by ticks.

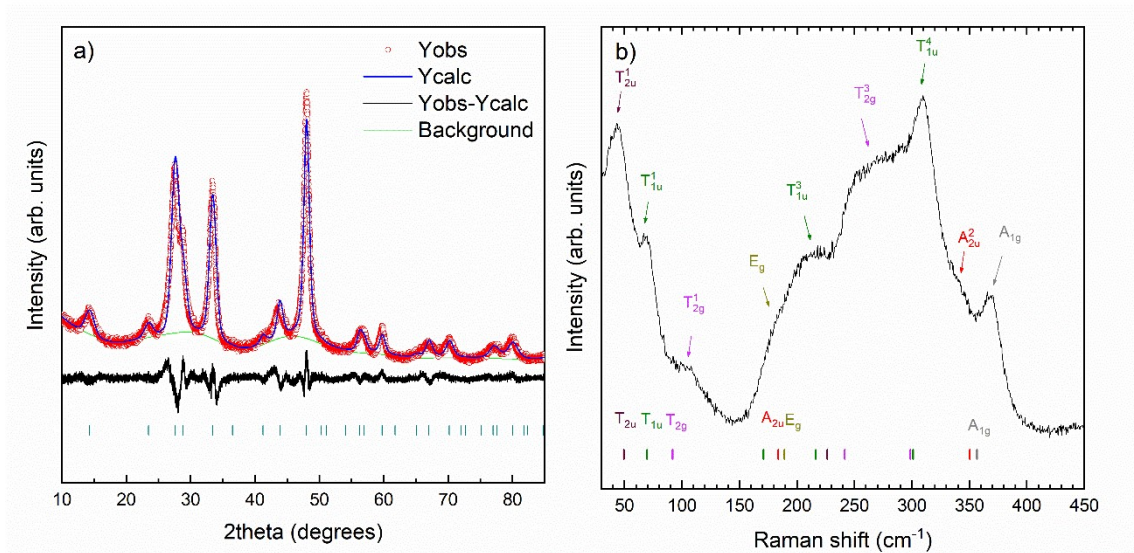

54

55 **Figure S5.** Theoretical one-phonon density of states of a)  $\beta$ - $\text{In}_2\text{S}_3$  and b)  $\text{CdIn}_2\text{S}_4$  at room  
56 pressure.

57

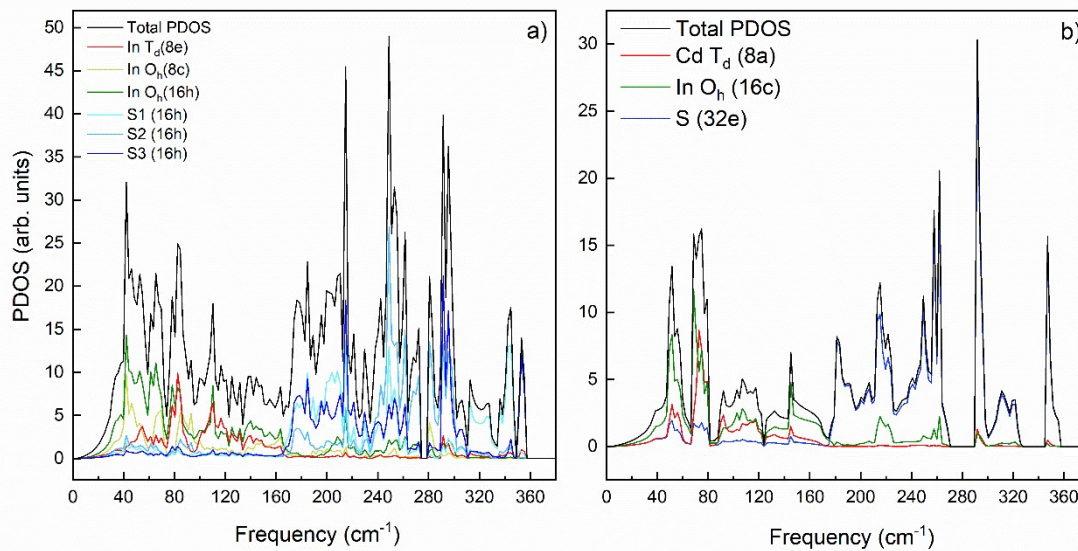

58

59

60

61

62

63

64

65

66

67

68

69

70

71

72

73

74

75 **Figure S6.** a) Theoretical volume dependence of the energy of  $\beta$  and  $\phi$ - $\text{In}_2\text{S}_3$  and b)  
76 theoretical pressure dependence of the enthalpy difference between  $\beta$  and  $\phi$ - $\text{In}_2\text{S}_3$ .  
77 Enthalpy of  $\beta$ - $\text{In}_2\text{S}_3$  is taken as reference.  
78

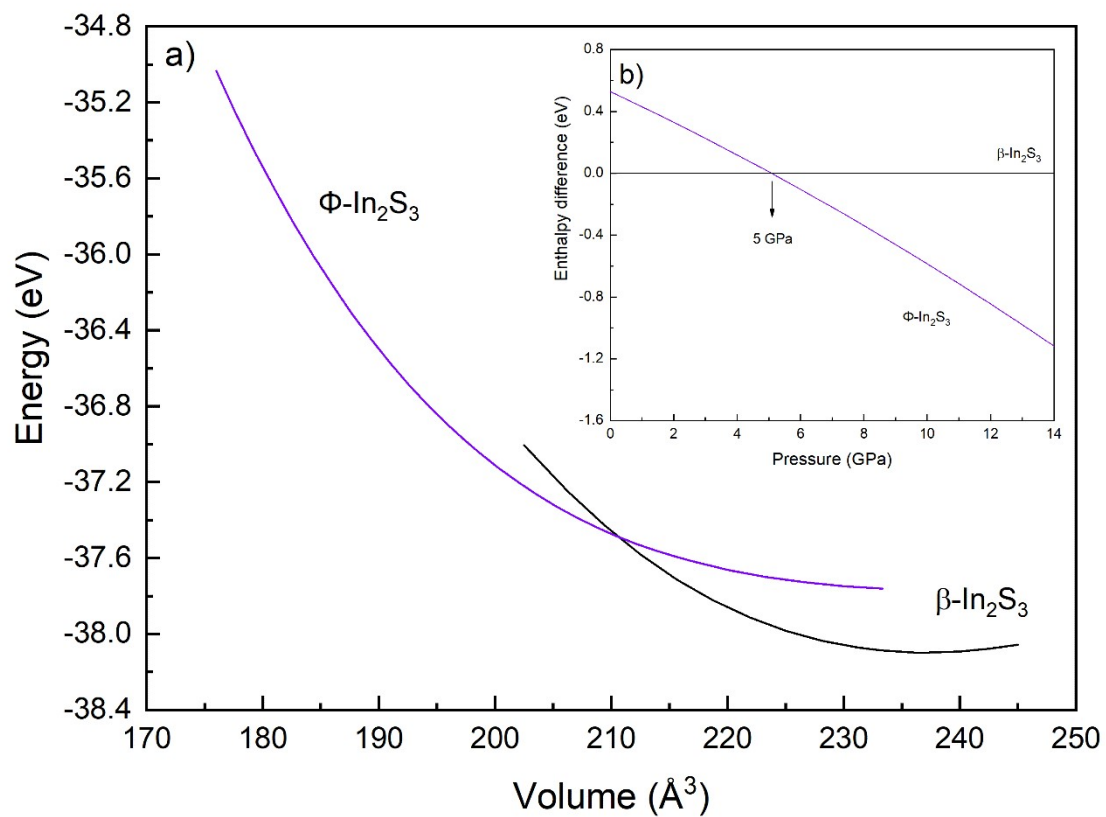

79
